# Supplementary material for: Sleep and Movement Differentiates Actions of Two Types of Somatostatin-Expressing GABAergic Interneuron in Rat Hippocampus
Source: PubMed Central journal article supplement — Neuron. 2014 May 21;82(4):872–86. doi: 10.1016/j.neuron.2014.04.007 (PMC4041064; doi:10.1016/j.neuron.2014.04.007), 2014-05-21
Supplement: mmc1.pdf [file mmc1.pdf]

Neuron, Volume 82

Supplemental Information

**Sleep and Movement Differentiates Actions  
of Two Types of Somatostatin-Expressing GABAergic  
Interneuron in Rat Hippocampus**

Linda Katona, Damien Lapray, Tim J. Viney, Abderrahim Oulhaj, Zsolt Borhegyi,  
Benjamin R. Micklem, Thomas Klausberger, and Peter Somogyi

## 1. Supplemental Figures

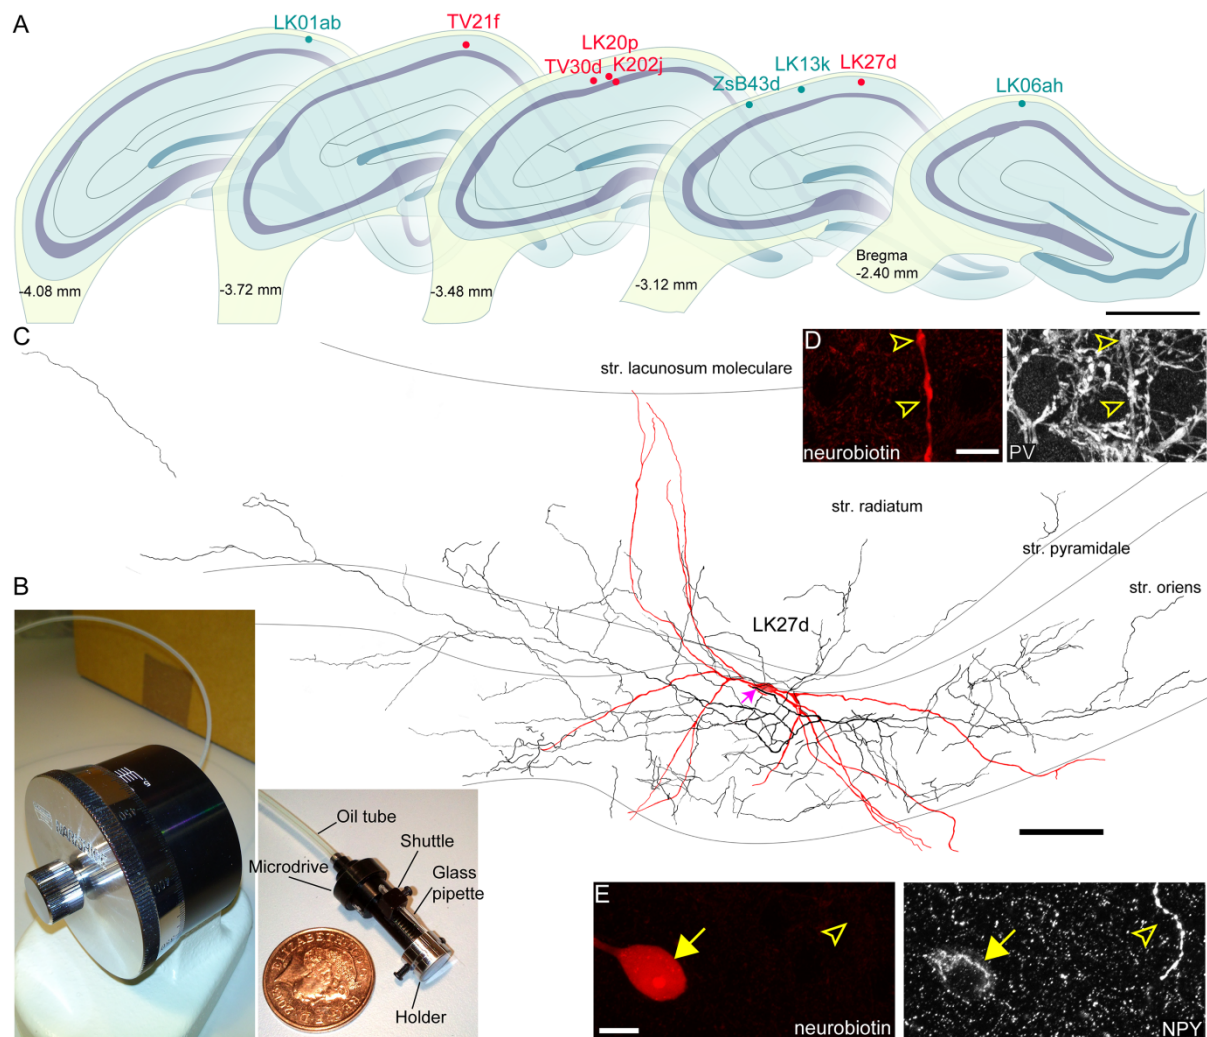

**Figure S1. *In vivo* extracellular recording and neurobiotin-labelling of single interneurons in freely moving rats and their positions in the hippocampus, related to Figures 1 and 2 and Experimental Procedures.** (A) Recording locations of labelled bistratified (red, n=5) and O-LM (blue, n=4) cells in CA1. Individual cell body locations in strata oriens and pyramidale are shown in schematic coronal sections from rostral to caudal direction, from left to right of the right hemisphere. Dark shaded bands show the pyramidal cell layer and the granule cell layer (blue) in the dentate gyrus. Scale bar, 1 mm. (B) Hydraulic (Narishige) microdrive (*right*) and manual manipulator (*left*). *Right*, the metal holder is cemented to the rat's skull and

the microdrive is secured inside with screws. The shuttle holding the glass pipette is advanced by moving the manipulator connected via the oil tube. (C) Reconstruction of the soma, complete dendritic tree (red, n=9 ~70  $\mu\text{m}$  thick sections) and representative part of the axon (black, 3 out of 20 70- $\mu\text{m}$ -thick sections; axonal origin, magenta arrow) of a bistratified cell with a soma horizontally aligned with the pyramidal layer. Note the heavy axonal innervation of stratum oriens, but collaterals also entered stratum radiatum to a lower extent. (D) A tested dendrite (arrowheads) was immunopositive for PV (maximum intensity projection, z-stack, height 3.1  $\mu\text{m}$ ). (E) The cell body (arrow) and a neighbouring non-labelled axon (arrowhead) were immunopositive for NPY (maximum intensity projection, z-stack, height 3.9  $\mu\text{m}$ ). Scale bars, C 100  $\mu\text{m}$ ; D,E 10  $\mu\text{m}$ .

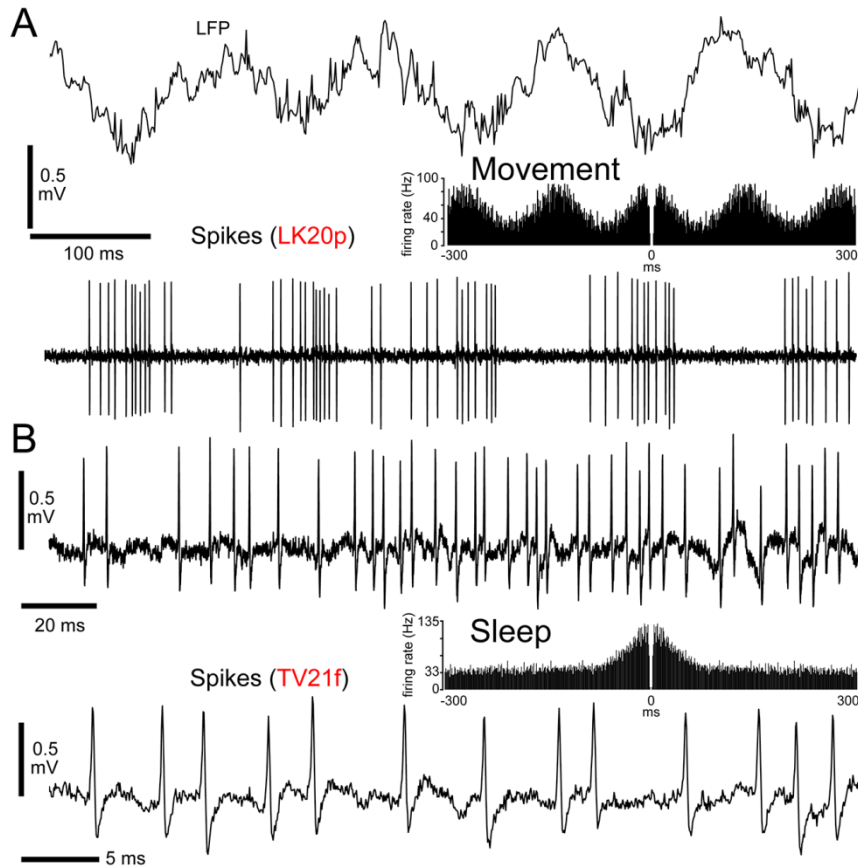

**Figure S2. Firing patterns of bistratified cells during movement and sleep demonstrating short inter-spike intervals, related to Figures 1 and 3.** (A) Spike train of a bistratified cell during movement. Note preferential timing of most spikes around the trough of the theta-oscillatory LFP (band-pass filtered 0.3-500 Hz). *Inset*, autocorrelogram of the interneuron. Note refractory period (1 ms time bins). (B) *Top*, spike train of a bistratified cell during sleep (band-pass filtered 0.8-5 kHz). *Bottom*, spike train at higher temporal resolution revealing uniform spike shapes. *Inset*, autocorrelogram of the interneuron. Note refractory period (1 ms time bins).

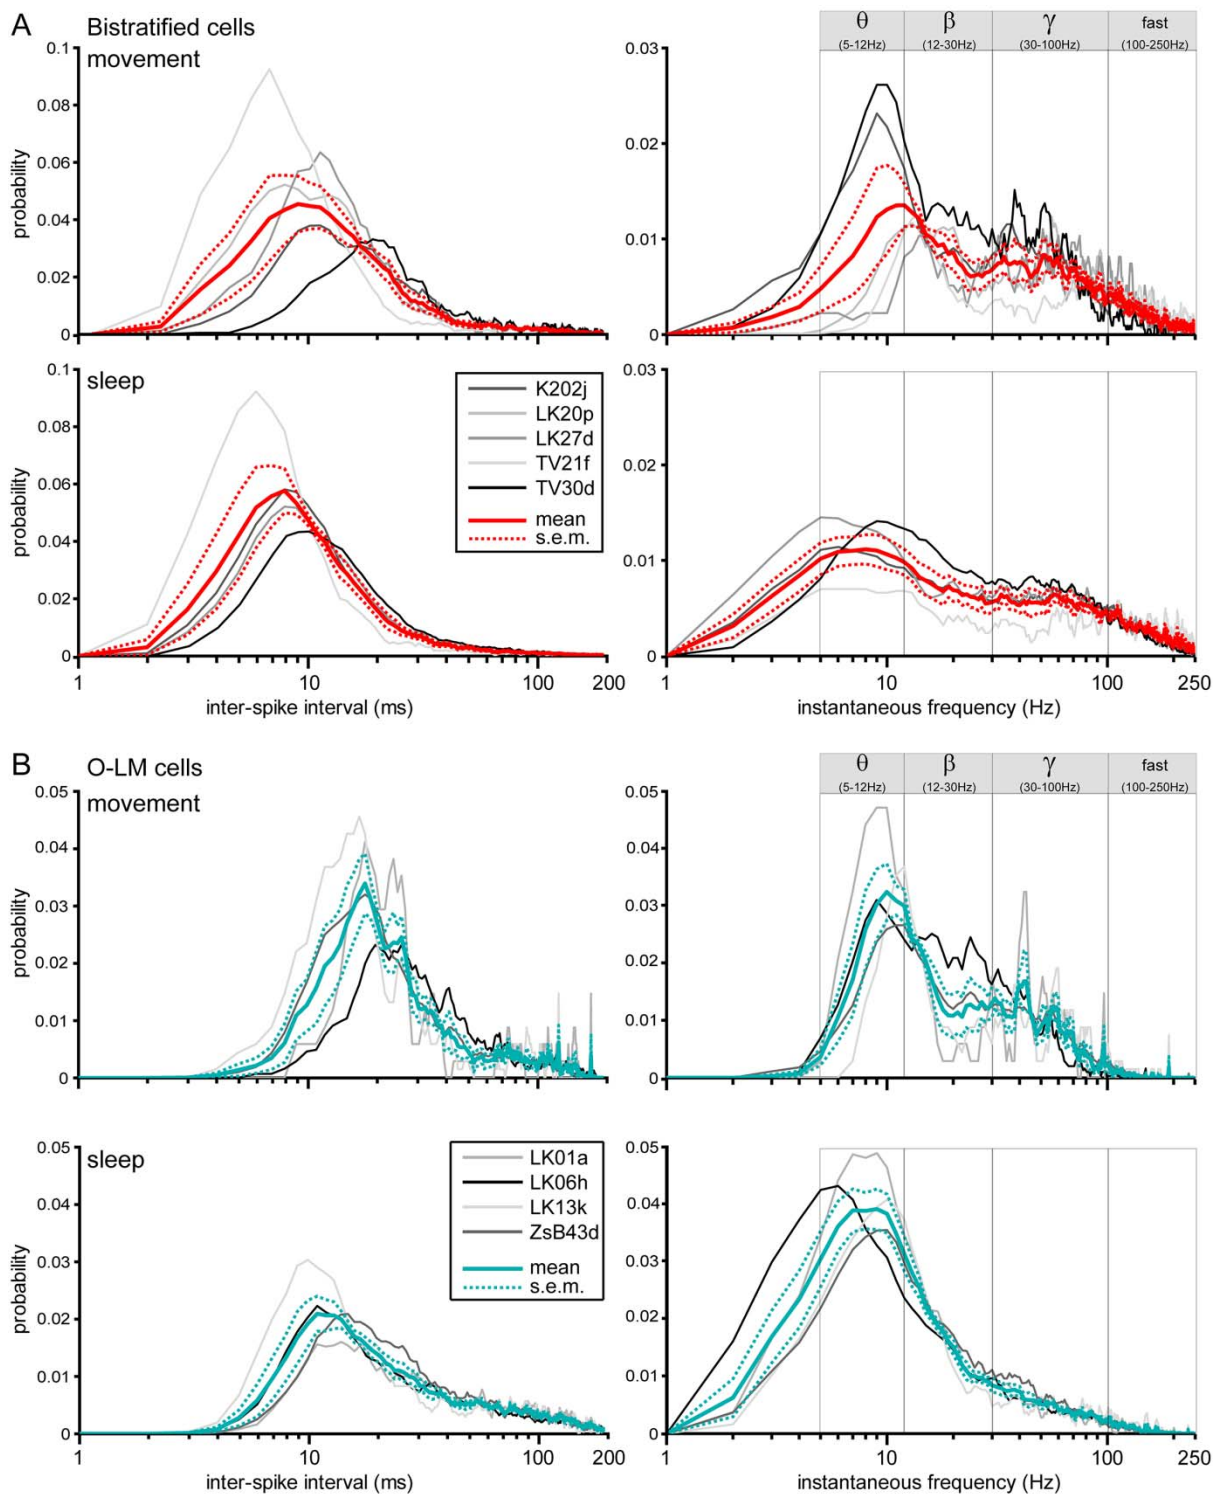

**Figure S3. Individual inter-spike interval (ISI) and instantaneous frequency (IF) distributions of bistratified and O-LM cells, related to Figure 3. (A) Left, ISI distributions (mean  $\pm$  s.e.m., solid and dashed lines) from all bistratified cells (individual cells, shades of grey; mean red) were calculated during sleep (top, n=4**

cells) and movement (*bottom*, n=5 cells). Individual ISI distributions resembled each other more during sleep than during movement; TV21f had shorter ISIs than the other bistratified cells. *Right*, corresponding IF distributions across frequency ranges.

(B) *Left*, ISI distributions (mean  $\pm$  s.e.m., solid and dashed lines) from all O-LM cells (individual cells, shades of grey; mean blue) were calculated during sleep (*top*, n=4 cells) and movement (*bottom*, n=4 cells). Distributions were more similar during sleep than movement. *Right*, corresponding IF distributions. Note logarithmic time and frequency scales limited to 200 ms and 250 Hz, respectively.

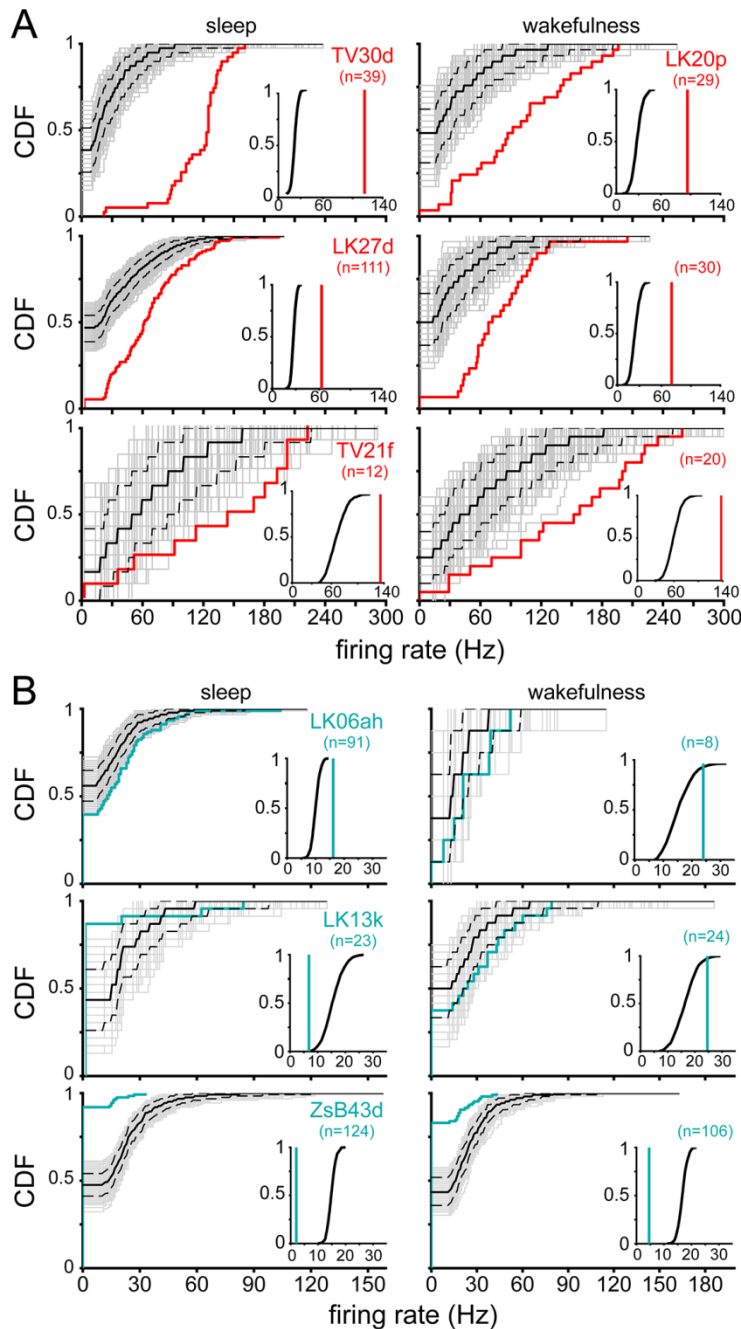

**Figure S4. SWR-related firing rate distributions of bistratified and O-LM cells, during sleep and wakefulness, related to Figure 5.** Bistratified cells (A) were activated by SWRs in all behavioural states (LK20p, no sleep period and TV30d no wakefulness recorded). The distribution of measured firing rates per individual SWRs are displayed as CDFs. For bistratified cells, the measured distributions (red) were significantly different from the medians (black) of the surrogate sets (2-sample KS-tests,  $n=4$  cells in total,  $p<0.05$

for all cells), and the right shift demonstrates an increase over the full range of firing rates. *Insets*, comparison of mean SWR-related firing rate (red lines), for each cell, with the distribution of surrogate mean rates (black lines). Bistratified cells (red) were strongly activated by SWRs, their measured mean rates were between 2 to 6 times higher than the means resulting from the surrogate distributions ( $p<0.05$  for *sleep*;  $p<0.05$  for *wakefulness*; relative to the CDFs for all four cells). O-LM cells (B)

changed their firing rates significantly during SWRs (2-sample KS-tests,  $n=3$  cells in total,  $p<0.05$ , for all cells). The shift to the left or right of the measured CDFs (blue) relative to the median of the surrogate CDFs (grey) over the full or part of the surrogate firing rate range indicates decreased or increased firing of O-LM cells, respectively. Surrogate sets of 1000 firing rate-distributions (grey; median, solid black line; 95% confidence intervals, broken lines). *Insets*, comparison of mean SWR-related firing rate (blue lines), for each cell with the distribution of surrogate mean SWR-related rates (black lines). During *sleep*, the mean rates of LK13k and ZsB43d were decreased ( $p=0.004$  for LK13k,  $p=0$  for ZsB43d, probabilities given by CDFs) and the rate of LK06ah was increased ( $p=0$ , probability given by CDF). For cells LK06ah and LK13k in the *awake* condition, the measured rates were higher than those expected from the surrogate sets. *Insets*, comparison of mean SWR-related firing rates (blue lines) with the distribution of surrogate mean SWR-related rates (black lines). The rate of ZsB43d was decreased ( $p=0$ , relative to the CDF) and the rates of LK06ah and LK13k were increased ( $p=0.01$  for LK06ah;  $p=0.009$  for LK13k; probabilities given by CDFs) during SWRs. Note the differences in X axis scales between bistratified and O-LM cells in the insets.



**Table S1. Statistical comparison of firing rates, bursting probability and spike counts of bistratified, O-LM and PV+ basket cells, related to Results.**

| Measure               | Comparison between                      | Condition            | One-way ANOVA               |              | Kruskal Wallis test |        |
|-----------------------|-----------------------------------------|----------------------|-----------------------------|--------------|---------------------|--------|
|                       |                                         |                      | F                           | p            | $\chi^2$            | p      |
| Firing rates          | bistratified, O-LM and PV+ basket cells | movement             | 2.02<br>(2,11)              | 0.1788       | 2.5657              | 0.2772 |
|                       |                                         | sleep                | 6.68<br>(2,10)              | 0.0144       | 7.9813              | 0.0185 |
|                       |                                         | quiet wakefulness    | 2.28<br>(2,11)              | 0.1485       | 3.9057              | 0.1419 |
|                       |                                         | theta oscillations   | 3.75<br>(2,11)              | 0.0572       | 4.7057              | 0.0951 |
|                       |                                         | SWRs                 | 23.73<br>(2,11)             | 0.0001       | 8.4629              | 0.0145 |
|                       |                                         | LOSC                 | 23.09<br>(2,10)             | 0.0002       | 8.6044              | 0.0135 |
|                       |                                         | Bursting probability | bistratified and O-LM cells | theta cycles | 7.41<br>(1,7)       | 0.0297 |
| SWRs                  | 27.38<br>(1,7)                          |                      |                             | 0.0012       | 6                   | 0.0143 |
| Mean number of spikes | bistratified and O-LM cells             | sleep-SWRs           | 49.59<br>(1,6)              | 0.0004       | 5.3333              | 0.0209 |
|                       |                                         | awake-SWRs           | 23.76<br>(1,6)              | 0.0028       | 5.3333              | 0.0209 |
|                       | sleep-SWRs and awake-SWRs               | bistratified cells   | 0.33<br>(1,6)               | 0.5864       | 0.3333              | 0.5637 |
|                       |                                         | O-LM cells           | 1.36<br>(1,6)               | 0.2884       | 1.3333              | 0.2482 |

**Table S2. Antibody information, related to Experimental Procedures.**

| <b>Molecule</b>                                                            | <b>Host species</b> | <b>Internal ref No.</b> | <b>Dilution</b>           | <b>Stock protein concentration (µg/ml)</b> | <b>Source</b>                                                                                                               | <b>Source code</b>       |
|----------------------------------------------------------------------------|---------------------|-------------------------|---------------------------|--------------------------------------------|-----------------------------------------------------------------------------------------------------------------------------|--------------------------|
| calbindin (CB)                                                             | rabbit              | 989                     | 1:5000                    | antiserum                                  | Swant, Bellinzona, Switzerland<br>( <a href="http://www.swant.com">www.swant.com</a> )                                      | CB-38 (lot 5.5)          |
| tyrosine-protein kinase receptor (ErbB4)                                   | mouse               | 1353                    | 1:1000                    | 200                                        | Thermo Fisher Scientific, Kalamazoo, MI, USA<br>( <a href="http://www.labvision.com">www.labvision.com</a> )                | MS-270-P, clone H4.77.16 |
| extracellular leucine-rich repeat fibronectin containing protein-2 (Efn 2) | rabbit              | 1432                    | 1:500                     |                                            | Sigma-Aldrich, St. Louis, MO, USA<br>( <a href="http://www.sigma-aldrich.com">www.sigma-aldrich.com</a> )                   | HPA000781                |
| multizinc finger protein (Fog-2) M-247                                     | rabbit              | 1369                    | 1:200                     | 200                                        | Santa Cruz Biotechnology Inc., Santa Cruz, CA, USA<br>( <a href="http://www.scbt.com">www.scbt.com</a> )                    | sc-10755                 |
| metabotropic glutamate receptor-1 alpha subunit (mGluR1a)                  | goat                | 1266                    | 1:750                     | 1220                                       | Prof. M. Watanabe, FRONTIER INSTITUTE Co. Ltd, Hokkaido, Japan                                                              | (Kind gift)              |
| metabotropic glutamate receptor-1 alpha subunit (mGluR1a)                  | guinea pig          | 1267                    | 1:500<br>1:1000<br>1:2000 | 660                                        | Prof. M. Watanabe, FRONTIER INSTITUTE Co. Ltd, Hokkaido, Japan                                                              | (Kind gift)              |
| metabotropic glutamate receptor-7 alpha subunit (mGluR7a)                  | rabbit              | 960                     | 1:1000<br>1:2000          | 500                                        | Prof. R. Shigemoto, Division of Cerebral Structure, Nat. Inst. Physiol. Sci, Okazaki, Japan                                 | (Kind gift)              |
| parvalbumin (PV)                                                           | goat                | 1258                    | 1:1000<br>1:2000          | antiserum                                  | Swant, Bellinzona, Switzerland<br>( <a href="http://www.swant.com">www.swant.com</a> )                                      | PVG-214 (lot 3.6)        |
| parvalbumin (PV)                                                           | guinea pig          | 1310                    | 1:5000                    | antiserum                                  | Synaptic Systems, Entwicklung und Produktion mbH, Goettingen, Germany<br>( <a href="http://www.sysy.com">www.sysy.com</a> ) | 195 004 (lot5)           |
| parvalbumin (PV)                                                           | mouse               | 922                     | 1:5000                    | antiserum                                  | Swant, Bellinzona, Switzerland<br>( <a href="http://www.swant.com">www.swant.com</a> )                                      | 235 (lot 10-11 F)        |
| special AT-rich sequence-binding protein-1 (Satb1) N-14                    | goat                | 1394                    | 1:200                     | 200                                        | Santa Cruz Biotechnology Inc., Santa Cruz, CA, USA<br>( <a href="http://www.scbt.com">www.scbt.com</a> )                    | sc-5989                  |
| special AT-rich sequence-binding protein-2 (Satb2) SATBA4B10               | mouse               | 1341                    | 1:100                     | 100                                        | Abcam, Cambridge, UK<br>( <a href="http://www.abcam.com">www.abcam.com</a> )                                                | ab51502                  |
| special AT-rich sequence-binding protein-1 (Satb1) N-14                    | rabbit              | 1393                    | 1:1000                    | 1000                                       | Abcam, Cambridge, UK<br>( <a href="http://www.abcam.com">www.abcam.com</a> )                                                | ab70004                  |
| somatostatin (SM)                                                          | mouse               | 1276                    | 1:200<br>1:400<br>1:500   | 140                                        | GeneTex Inc., Irvine, CA, USA<br>( <a href="http://www.genetex.com">www.genetex.com</a> )                                   | GTX71935 (clone SOM-018) |
| somatostatin (SM)                                                          | rat                 | 815                     | 1:500                     | 1000                                       | EMD Millipore Corporation, Billerica, MA, USA<br>( <a href="http://www.millipore.com">www.millipore.com</a> )               | MAB354                   |
| neuropeptide Y (NPY)                                                       | rabbit              | 1011                    | 1:5000                    | antiserum                                  | ImmunoStar Inc.(DiaSorin), Hudson, WI, USA<br>( <a href="http://www.immunostar.com">www.immunostar.com</a> )                | 22940 (lot 208001)       |

| <b>Molecule (repeated)</b>                                                  | <b>Host species</b> | <b>Epitope, amino acid residues</b>                                                         | <b>Antibody specificity information</b>                                                                                                                                                                                                                                                            | <b>Notes</b>                                                                                                                               |
|-----------------------------------------------------------------------------|---------------------|---------------------------------------------------------------------------------------------|----------------------------------------------------------------------------------------------------------------------------------------------------------------------------------------------------------------------------------------------------------------------------------------------------|--------------------------------------------------------------------------------------------------------------------------------------------|
| calbindin (CB)                                                              | rabbit              | polyclonal, recombinant rat calbindin D-28k                                                 | Knock out test in mouse: (Airaksinen et al., 1997); characterisation in rat hippocampus: (Sloviter, 1989).                                                                                                                                                                                         |                                                                                                                                            |
| tyrosine-protein kinase receptor (ErbB4)                                    | mouse               | monoclonal, extracellular fragment, recombinant human c-erbB4/HER-4 oncoprotein             | Generation, knock out tests, western blot band as expected: (Chen et al., 1996; Neddens et al., 2011; Vullhorst et al., 2009).                                                                                                                                                                     | Cortical GABA circuit development controlled by ErbB4 signalling (Fazzari et al., 2010).                                                   |
| extracellular leucine-rich repeat fibronectin containing protein-2 (Elfn 2) | rabbit              | polyclonal, affinity isolated, human ELFN2, recombinant protein epitope signature tag       | Protein array and western blot tests: (Sylwestrak and Ghosh, 2012); developed and validated by the Human Protein Atlas project.                                                                                                                                                                    | Labels interneurons via cross-reactivity with Elfn1.                                                                                       |
| multizinc finger protein (Fog-2) M-247                                      | rabbit              | polyclonal, epitope aa880-1126 mapping at the C-terminus of FOG-2 of mouse origin           | Western blot by the company (Dale et al., 2007; Roche et al., 2008).                                                                                                                                                                                                                               |                                                                                                                                            |
| metabotropic glutamate receptor-1 alpha subunit (mGluR1a)                   | goat                |                                                                                             | Personal communication with Prof. M. Watanabe.                                                                                                                                                                                                                                                     | In some interneurons it labels a reticular pattern instead of labelling the plasma membrane.                                               |
| metabotropic glutamate receptor-1 alpha subunit (mGluR1a)                   | guinea pig          | affinity purified                                                                           | (Nakamura et al., 2004)                                                                                                                                                                                                                                                                            | In some interneurons it labels a reticular pattern instead of labelling the plasma membrane.                                               |
| metabotropic glutamate receptor-7 alpha subunit (mGluR7a)                   | rabbit              | rat mGluR7 affinity purified, aa874-915                                                     | (Klausberger et al., 2005; Shigemoto et al., 1997; Shigemoto et al., 1996)                                                                                                                                                                                                                         |                                                                                                                                            |
| parvalbumin (PV)                                                            | goat                | polyclonal, rat muscle PV                                                                   | Knock out tests in mouse: (Schwaller et al., 1999), Swant; western blot on rodent brain homogenate, single ~12 kDa band labelled (p. comm. E. Celio): (Constantinople et al., 2009).                                                                                                               |                                                                                                                                            |
| parvalbumin (PV)                                                            | guinea pig          | polyclonal, recombinant full length rat PV                                                  | Western blot, abolished by pre-absorption with recombinant PV; knockout test in mouse: (Schwaller et al., 1999); same labelling with antibodies from: Synaptic Systems, rabbit 195 002, Swant, monoclonal 235; rat hippocampus: (Kosaka et al., 1987; Sloviter, 1989).                             |                                                                                                                                            |
| parvalbumin (PV)                                                            | mouse               | monoclonal, purified carp muscle PV                                                         | Knockout tests: in mouse (Schwaller et al., 1999); similar to other PV antibodies; characterization: (Celio et al., 1988).                                                                                                                                                                         |                                                                                                                                            |
| special AT-rich sequence-binding protein-1 (Satb1) N-14                     | goat                | polyclonal, N-terminus, human SATB1                                                         | Knockout test in mouse: (Balamotis et al., 2012); mouse cortex: (Huang et al., 2011); same labelling as rabbit antibody ab70004.                                                                                                                                                                   | Labels in addition SATB2-expressing nuclei in CA1 when used at 1:100 dilution. Weakly labels hilar neuron nuclei.                          |
| special AT-rich sequence-binding protein-2 (Satb2) SATBA4B10                | mouse               | monoclonal, recombinant fragment C-terminal, human SATB2.                                   | Knockout tests in mouse: (Britanova et al., 2005; Britanova et al., 2008; Britanova et al., 2006; Dobreva et al., 2006); adult mouse brain: (Nielsen et al., 2010); same labelling as rabbit antibody ab34735 with additional signal for SATB1.                                                    | Labels pyramidal cells and a subpopulation of interneurons in CA1, consistent with the combination of specific SATB2 and SATB1 antibodies. |
| special AT-rich sequence-binding protein-1 (Satb1) N-14                     | rabbit              | polyclonal, 18 aa near N-terminus, human SATB1                                              | Knockout test in mouse: (Balamotis et al., 2012); mouse cortex: (Huang et al., 2011); no signal for knockout for a similar rabbit antibody; original rabbit antibody: (Dickinson et al., 1992); western blot in mouse, different band than SATB2 at P1; colocalization with NeuN, neuron specific. | Labels interneurons exclusively in hippocampus.                                                                                            |
| somatostatin (SM)                                                           | mouse               | monoclonal, conjugated to protein carrier, human SOM                                        | Rat antibody test: (Kubota et al., 2011); labelling pattern same as with rat antibody Chemicon MAB364; no signal in preabsorption test for rat antibody; mouse hippocampus using rat antibody: (Jinno and Kosaka, 2000).                                                                           | Labels dendrites and axon stronger than other SOM antibodies.                                                                              |
| somatostatin (SM)                                                           | rat                 | monoclonal, synthetic 1-14 cyclic SOM conjugated to bovine thyroglobulin using carbodiimide | Same labelling as other antibodies: (Kubota et al., 2011).                                                                                                                                                                                                                                         |                                                                                                                                            |
| neuropeptide Y (NPY)                                                        | rabbit              | polyclonal, synthetic porcine NPY conjugated to methylated bovine serum albumin.            | Antibody generation and characterization: (Allen et al., 1983); absorption-tested by manufacturer to 6 other peptides, no cross-reactivity observed; labelling as with other antibodies.                                                                                                           | Strong immunoreactivity observed in subpopulations of hippocampal interneurons, no significant background.                                 |

**Table S3. Point estimates of ISI distributions of bistratified and O-LM cells, related to Figure 3 and 4 and Supplemental Figure S3.**

| Median $\pm$ interquartile range of ISI (ms) |        |          |            |       |             |                   |
|----------------------------------------------|--------|----------|------------|-------|-------------|-------------------|
| Cell type                                    | Cell   | Movement |            | Sleep |             | Quiet wakefulness |
| Bistratified cells                           | K202j  | 20.4     | $\pm$ 37.3 | 13.2  | $\pm$ 22.3  | 15.9 $\pm$ 31.1   |
|                                              | LK20p  | 12.6     | $\pm$ 17.3 | NA    | $\pm$ NA    | 12.9 $\pm$ 21.1   |
|                                              | LK27d  | 13.3     | $\pm$ 14.3 | 15.0  | $\pm$ 26.9  | 13.5 $\pm$ 16.8   |
|                                              | TV21f  | 7.7      | $\pm$ 10.2 | 7.7   | $\pm$ 10.9  | 7.3 $\pm$ 9.1     |
|                                              | TV30d  | 25.8     | $\pm$ 43.4 | 17.4  | $\pm$ 29.8  | 22.8 $\pm$ 42.5   |
| O-LM cells                                   | LK01ab | 26.0     | $\pm$ 66.4 | 65.6  | $\pm$ 101.5 | 42.7 $\pm$ 66.3   |
|                                              | LK06ah | 39.2     | $\pm$ 44.6 | 54.8  | $\pm$ 119.6 | 41.8 $\pm$ 60.2   |
|                                              | LK13k  | 22.5     | $\pm$ 38.3 | 45.5  | $\pm$ 87.8  | 26.2 $\pm$ 45.1   |
|                                              | ZsB43d | 27.6     | $\pm$ 43.7 | 44.4  | $\pm$ 76.5  | 42.1 $\pm$ 57.5   |

  

| Cell type          | Cell   | Theta |            | SWRs |            | LOSC            |
|--------------------|--------|-------|------------|------|------------|-----------------|
| Bistratified cells | K202j  | 22.4  | $\pm$ 36.3 | 6.4  | $\pm$ 3.7  | 24.1 $\pm$ 73.2 |
|                    | LK20p  | 13.2  | $\pm$ 19.4 | 6.2  | $\pm$ 4.3  | 20.9 $\pm$ 21.9 |
|                    | LK27d  | 13.4  | $\pm$ 15.4 | 8.9  | $\pm$ 8.2  | 14.1 $\pm$ 19.8 |
|                    | TV21f  | 7.6   | $\pm$ 9.9  | 4.9  | $\pm$ 2.9  | NA $\pm$ NA     |
|                    | TV30d  | 23.1  | $\pm$ 46.7 | 6.7  | $\pm$ 3.4  | 20.4 $\pm$ 46.4 |
| O-LM cells         | LK01ab | 36.2  | $\pm$ 66.2 | 15.0 | $\pm$ 19.7 | 44.5 $\pm$ 54.5 |
|                    | LK06ah | 38.9  | $\pm$ 54.3 | 14.9 | $\pm$ 19.3 | 45.8 $\pm$ 53.0 |
|                    | LK13k  | 23.3  | $\pm$ 47.6 | 7.1  | $\pm$ 4.1  | 30.0 $\pm$ 45.7 |
|                    | ZsB43d | 38.2  | $\pm$ 53.8 | 20.1 | $\pm$ 5.4  | 43.5 $\pm$ 60.1 |

## **2. Supplemental Experimental Procedures**

### **Experimental subjects**

Animals were housed in groups of 2–4 per cage in Oxford (8 rats; 19–21C°; 55% humidity; reverse light/dark cycle, lights on from 8pm–8am) or Vienna (1 rat; diurnal cycle, lights on from 6am–6pm). One to 7 days before the protocol started, rats were housed in a cage on their own with *ad libitum* access to food pellets and water. The rat in Vienna received chocolate chip rewards given during some recording sessions.

### **Microdrive, recording and reference electrodes**

In short, we attached a cylindrical microdrive holder above the left parietal cortex using dental acrylic (Refobacin R, Biomet). A main connector was placed above the frontal part of the skull, supported by five stainless steel screws. EEG and reference-ground signals were fed into this head stage from one screw above the right prefrontal cortex (bregma -4 mm rostro-caudal, bregma +2 mm medio-lateral) and another above the cerebellum, respectively. Following recovery of a minimum of three days, the animal was anaesthetised, and after a craniotomy either a single wire electrode (50  $\mu$ m tungsten, California Fine Wire; n=5 rats) fixed on the skull or movable by a miniature drive (Haiss et al., 2010) or a microdrive movable tetrode (n=4 rats) (Neuronelektrod Kft., Budapest, Hungary) was lowered into the right hippocampus or cortex. A layer of silicone (Kwik-Sil, World Precision Instruments) was used to protect the cortical surface between recordings.

### ***In vivo* behavioural recordings and juxtacellular neurobiotin-labelling in freely moving rats and data acquisition**

Rats were anaesthetised briefly by isoflurane and a miniature preamplifier (NPI Electronic), two LED arrays and an accelerometer (Supertech Instruments; n=5

rats) were connected to the head stage. A glass electrode filled with neurobiotin (1.5 or 3%, wt/vol, in 0.5 M NaCl) was advanced using a hydraulic (Narishige, Figure S1B) or piezoelectric (Kleindiek Nanotechnik) (Lee et al., 2006) microdrive. Recordings commenced 1h after recovery from anaesthesia in a darkened room using a recording arena (40 × 40 cm floor; 27 cm walls or 50 × 50 cm floor, 27 cm walls in Oxford; 40 × 60cm floor, 30 cm walls in Vienna) to which the rats were naive on the first day. The rats were followed on two video cameras, one infra-red sensitive for behavioural analysis and another one for position tracking (software courtesy of Dr. K. Allen). Recordings were performed for 1–12 days ( $4.9 \pm 3.1$  days) after duratomy. After recording a cell, the pipette was advanced towards the neuron and juxtacellular labelling was attempted (Pinault, 1996). When deemed successful, the pipette was retracted slightly and the neuron was left to recover from the entrainment. The animal was deeply anaesthetised and perfusion fixed 1–3 h later. When stable neurons were not found sessions were finished by removal of the recording setup and by covering the cortical surface with silicone between consecutive days.

Signals were amplified 1000x (BF-48DGX and DPA-2FS, NPI Electronic) and digitised at 1 or 20 kHz (Power1401 A/D board, Cambridge Electronics Design). Measurements from the glass electrode were online band-pass filtered according to three different frequency ranges (0.3 Hz –10 kHz, wide-band; 0.3–500 Hz, LFP; 0.8–5 kHz, action potentials). Signals from the hippocampal/cortical electrodes were wide-band filtered. Elimination of 50 Hz noise without phase-shift was provided by Hum Bugs (Quest Scientific Instruments). Accelerometer measurements were digitised at 1 or 20 kHz. Acquisition of all signals, except tracking, went in parallel using Spike2 software (v7.01, Cambridge Electronics Design).

## **Electrophysiological data analyses**

For each interneuron, we computed the theta phases of the recorded spikes. We determined whether the cell was theta modulated using Rayleigh's method (Zar, 1999) and if the theta phases resulted in a non-uniform distribution around the theta cycle. Using normalised vector addition, we calculated the cell's mean phase angle and the depth of the cell's theta modulation. Data was averaged across individual cells of the same type. For the quantitative comparison of distinct cell types we used two-sample permutation tests (Good, 2000).

Recorded spike trains were segmented according to behavioural and oscillatory network states and analysed one by one. For each interneuron, the periods between two consecutive action potentials (ISI) have been measured and their distributions analysed. The ISI distributions of individual cells of a given type were averaged and the resulting mean  $\pm$  s.e.m. was considered as the representative ISI distribution for the cell type during a given state. Additionally, we calculated point estimates (median  $\pm$  interquartile range) for the individual ISI distributions per cell and per state (Table S3).

## **Neuronal 3D reconstructions**

Neurons were digitally reconstructed in 3D from resin-embedded, osmium-treated sections reacted for HRP using NeuroLucida (MBF Bioscience), a Nikon Eclipse 80i transmitted light microscope and Lucivid microdisplay (MBF Bioscience) in continuous mode using a VC Plan Apo 100x/1.4 oil immersion objective.

## **Antibody information**

Secondary antibodies conjugated to Alexa488 and Alexa405 fluorophores were purchased from Invitrogen. Secondary antibodies conjugated to Cy3, Cy5, DyLight405, DyLight488, DyLight594 and DyLight649 fluorophores were purchased from Stratech.

### 3. Supplemental References

- Airaksinen, M.S., Eilers, J., Garaschuk, O., Thoenen, H., Konnerth, A., and Meyer, M. (1997). Ataxia and altered dendritic calcium signaling in mice carrying a targeted null mutation of the calbindin D28k gene. *Proc. Natl. Acad. Sci. USA* 94, 1488-1493.
- Allen, Y.S., Adrian, T.E., Allen, J.M., Tatemoto, K., Crow, T.J., Bloom, S.R., and Polak, J.M. (1983). Neuropeptide Y distribution in the rat brain. *Science* 221, 877-879.
- Balamotis, M.A., Tamberg, N., Woo, Y.J., Li, J., Davy, B., Kohwi-Shigematsu, T., and Kohwi, Y. (2012). *Satb1* ablation alters temporal expression of immediate early genes and reduces dendritic spine density during postnatal brain development. *Mol. Cell Biol.* 32, 333-347.
- Britanova, O., Akopov, S., Lukyanov, S., Gruss, P., and Tarabykin, V. (2005). Novel transcription factor *Satb2* interacts with matrix attachment region DNA elements in a tissue-specific manner and demonstrates cell-type-dependent expression in the developing mouse CNS. *Eur. J. Neurosci.* 21, 658-668.
- Britanova, O., de Juan Romero, C., Cheung, A., Kwan, K.Y., Schwark, M., Gyorgy, A., Vogel, T., Akopov, S., Mitkovski, M., Agoston, D., *et al.* (2008). *Satb2* is a postmitotic determinant for upper-layer neuron specification in the neocortex. *Neuron* 57, 378-392.
- Britanova, O., Depew, M.J., Schwark, M., Thomas, B.L., Miletich, I., Sharpe, P., and Tarabykin, V. (2006). *Satb2* haploinsufficiency phenocopies 2q32-q33 deletions, whereas loss suggests a fundamental role in the coordination of jaw development. *Am. J. Hum. Genet.* 79, 668-678.
- Celio, M.R., Baier, W., Schäfer, L., De Viragh, P.A., and Gerday, C. (1988). Monoclonal antibodies directed against the calcium binding protein parvalbumin. *Cell Calcium* 9, 81-86.
- Chen, X., Levkowitz, G., Tzahar, E., Karunakaran, D., Lavi, S., Ben-Baruch, N., Leitner, O., Ratzkin, B.J., Bacus, S.S., and Yarden, Y. (1996). An immunological approach reveals biological differences between the two NDF/Heregulin receptors, ErbB-3 and ErbB-4. *J. Biol. Chem.* 271, 7620-7629.
- Constantinople, C.M., Disney, A.A., Maffie, J., Rudy, B., and Hawken, M.J. (2009). Quantitative analysis of neurons with Kv3 potassium channel subunits, Kv3.1b and Kv3.2, in macaque primary visual cortex. *J. Comp. Neurol.* 516, 291-311.
- Dale, R.M., Remo, B.F., and Svensson, E.C. (2007). An alternative transcript of the FOG-2 gene encodes a FOG-2 isoform lacking the FOG repression motif. *Biochem. Biophys. Res. Commun.* 357, 683-687.
- Dickinson, L.A., Joh, T., Kohwi, Y., and Kohwi-Shigematsu, T. (1992). A tissue-specific MARSAR DNA-binding protein with unusual binding site recognition. *Cell* 70, 631-645.
- Dobrev, G., Chahrour, M., Dautzenberg, M., Chirivella, L., Kanzler, B., Fariñas, I., Karsenty, G., and Grosschedl, R. (2006). SATB2 is a multifunctional determinant of craniofacial patterning and osteoblast differentiation. *Cell* 125, 971-986.
- Fazzari, P., Paternain, A.V., Valiente, M., Pla, R., Lujan, R., Lloyd, K., Lerma, J., Marin, O., and Rico, B. (2010). Control of cortical GABA circuitry development by *Nrg1* and ErbB4 signalling. *Nature* 464, 1376-1380.
- Good, P. (2000). *Permutation tests : a practical guide to resampling methods for testing hypotheses* (New York: Springer).



- Haiss, F., Butovas, S., and Schwarz, C. (2010). A miniaturized chronic microelectrode drive for awake behaving head restrained mice and rats. *J. Neurosci. Methods* 187, 67-72.
- Huang, Y., Zhang, L., Song, N.-N., Hu, Z.-L., Chen, J.-Y., and Ding, Y.-Q. (2011). Distribution of *Satb1* in the central nervous system of adult mice. *Neurosci. Res.* 71, 12-21.
- Jinno, S., and Kosaka, T. (2000). Colocalization of parvalbumin and somatostatin-like immunoreactivity in the mouse hippocampus: Quantitative analysis with optical disector. *J. Comp. Neurol.* 428, 377-388.
- Klausberger, T., Marton, L.F., O'Neill, J., Huck, J.H.J., Dalezios, Y., Fuentealba, P., Suen, W.Y., Papp, E., Kaneko, T., Watanabe, M., *et al.* (2005). Complementary roles of cholecystinin- and parvalbumin-expressing GABAergic neurons in hippocampal network oscillations. *J. Neurosci.* 25, 9782-9793.
- Kosaka, T., Katsumaru, H., Hama, K., Wu, J.-Y., and Heizmann, C.W. (1987). GABAergic neurons containing the Ca<sup>2+</sup>-binding protein parvalbumin in the rat hippocampus and dentate gyrus. *Brain Res.* 419, 119-130.
- Kubota, Y., Shigematsu, N., Karube, F., Sekigawa, A., Kato, S., Yamaguchi, N., Hirai, Y., Morishima, M., and Kawaguchi, Y. (2011). Selective coexpression of multiple chemical markers defines discrete populations of neocortical GABAergic neurons. *Cereb. Cortex* 21, 1803-1817.
- Lee, A.K., Manns, I.D., Sakmann, B., and Brecht, M. (2006). Whole-cell recordings in freely moving rats. *Neuron* 51, 399-407.
- Nakamura, M., Sato, K., Fukaya, M., Araishi, K., Aiba, A., Kano, M., and Watanabe, M. (2004). Signaling complex formation of phospholipase C $\beta$ 4 with metabotropic glutamate receptor type 1 $\alpha$  and 1,4,5-trisphosphate receptor at the perisynapse and endoplasmic reticulum in the mouse brain. *Eur. J. Neurosci.* 20, 2929-2944.
- Neddens, J., Fish, K.N., Tricoire, L., Vullhorst, D., Shamir, A., Chung, W., Lewis, D.A., McBain, C.J., and Buonanno, A. (2011). Conserved interneuron-specific ErbB4 expression in frontal cortex of rodents, monkeys, and humans: Implications for schizophrenia. *Biol. Psychiatry* 70, 636-645.
- Nielsen, J.V., Blom, J.B., Noraberg, J., and Jensen, N.A. (2010). *Zbtb20*-induced CA1 pyramidal neuron development and area enlargement in the cerebral midline cortex of mice. *Cereb. Cortex* 20, 1904-1914.
- Pinault, D. (1996). A novel single-cell staining procedure performed in vivo under electrophysiological control: morpho-functional features of juxtacellularly labeled thalamic cells and other central neurons with biocytin or Neurobiotin. *J. Neurosci. Methods* 65, 113-136.
- Roche, A.E., Bassett, B.J., Samant, S.A., Hong, W., Blobel, G.A., and Svensson, E.C. (2008). The zinc finger and C-terminal domains of MTA proteins are required for FOG-2-mediated transcriptional repression via the NuRD complex. *J. Mol. Cell. Cardiol.* 44, 352-360.
- Schwaller, B., Dick, J., Dhoot, G., Carroll, S., Vrbova, G., Nicotera, P., Pette, D., Wyss, A., Bluethmann, H., Hunziker, W., and Celio, M.R. (1999). Prolonged contraction-relaxation cycle of fast-twitch muscles in parvalbumin knockout mice. *Am. J. Physiol. Cell Physiol.* 276, C395-C403.
- Shigemoto, R., Kinoshita, A., Wada, E., Nomura, S., Ohishi, H., Takada, M., Flor, P.J., Neki, A., Abe, T., Nakanishi, S., and Mizuno, N. (1997). Differential presynaptic localization of metabotropic glutamate receptor subtypes in the rat hippocampus. *J. Neurosci.* 17, 7503-7522.

- Shigemoto, R., Kulik, A., Roberts, J.D.B., Ohishi, H., Nusser, Z., Kaneko, T., and Somogyi, P. (1996). Target-cell-specific concentration of a metabotropic glutamate receptor in the presynaptic active zone. *Nature* 381, 523-525.
- Sloviter, R.S. (1989). Calcium-binding protein (calbindin-D28k) and parvalbumin immunocytochemistry: Localization in the rat hippocampus with specific reference to the selective vulnerability of hippocampal neurons to seizure activity. *J. Comp. Neurol.* 280, 183-196.
- Sylwestrak, E.L., and Ghosh, A. (2012). Efn1 regulates target-specific release probability at CA1-interneuron synapses. *Science* 338, 536-540.
- Vullhorst, D., Neddens, J., Karavanova, I., Tricoire, L., Petralia, R.S., McBain, C.J., and Buonanno, A. (2009). Selective expression of ErbB4 in interneurons, but not pyramidal cells, of the rodent hippocampus. *J. Neurosci.* 29, 12255-12264.
- Zar, J.H. (1999). *Biostatistical analysis*, 4 edn (Upper Saddle River: Prentice Hall).
